# Supplementary material for: Quantitative assessment of the susceptibility artefact and its interaction with motion in diffusion MRI
Source: PubMed Central journal article supplement (PMC5624609; doi:10.1371/journal.pone.0185647), 2017-10-02
Supplement: pone.0185647.s002.pdf [file pone.0185647.s002.pdf]

|              |                                            | GT + noise | RB     | FMB    | MPB    | MPB/F |
|--------------|--------------------------------------------|------------|--------|--------|--------|-------|
| SNR $\infty$ | FA                                         | 0.000      | 0.049  | 0.024  | 0.019  | 0.016 |
|              | MD / $10^{-3} \text{ mm}^2 \text{ s}^{-1}$ | 0.000      | 0.077  | 0.073  | 0.048  | 0.040 |
|              | V1 / degrees                               | 0.000      | 3.602  | 1.693  | 1.008  | 0.687 |
| SNR 40       | FA                                         | 0.015      | 0.054  | 0.031  | 0.026  | 0.020 |
|              | MD / $10^{-3} \text{ mm}^2 \text{ s}^{-1}$ | 0.015      | 0.154  | 0.110  | 0.078  | 0.072 |
|              | V1 / degrees                               | 4.185      | 20.363 | 5.495  | 5.201  | 3.564 |
| SNR 20       | FA                                         | 0.049      | 0.083  | 0.054  | 0.052  | 0.036 |
|              | MD / $10^{-3} \text{ mm}^2 \text{ s}^{-1}$ | 0.056      | 0.193  | 0.129  | 0.103  | 0.087 |
|              | V1 / degrees                               | 12.470     | 21.283 | 11.352 | 11.865 | 9.057 |

(a) **Large distortion.** Errors in diffusion metrics averaged across all brain voxels with  $>6$  mm geometric distortion.

|              |                                            | GT + noise | RB     | FMB   | MPB    | MPB/F |
|--------------|--------------------------------------------|------------|--------|-------|--------|-------|
| SNR $\infty$ | FA                                         | 0.000      | 0.021  | 0.016 | 0.012  | 0.010 |
|              | MD / $10^{-3} \text{ mm}^2 \text{ s}^{-1}$ | 0.000      | 0.081  | 0.085 | 0.053  | 0.044 |
|              | V1 / degrees                               | 0.000      | 4.923  | 1.919 | 1.276  | 0.826 |
| SNR 40       | FA                                         | 0.016      | 0.029  | 0.023 | 0.020  | 0.015 |
|              | MD / $10^{-3} \text{ mm}^2 \text{ s}^{-1}$ | 0.021      | 0.092  | 0.105 | 0.059  | 0.049 |
|              | V1 / degrees                               | 3.892      | 7.783  | 3.918 | 3.970  | 2.833 |
| SNR 20       | FA                                         | 0.050      | 0.052  | 0.045 | 0.047  | 0.033 |
|              | MD / $10^{-3} \text{ mm}^2 \text{ s}^{-1}$ | 0.072      | 0.128  | 0.130 | 0.093  | 0.075 |
|              | V1 / degrees                               | 11.736     | 12.663 | 9.858 | 10.976 | 7.875 |

(b) **Medium distortion.** Errors in diffusion metrics averaged across all brain voxels with  $>2$  mm and  $<6$  mm geometric distortion.

|              |                                            | GT + noise | RB     | FMB   | MPB    | MPB/F |
|--------------|--------------------------------------------|------------|--------|-------|--------|-------|
| SNR $\infty$ | FA                                         | 0.000      | 0.013  | 0.013 | 0.009  | 0.007 |
|              | MD / $10^{-3} \text{ mm}^2 \text{ s}^{-1}$ | 0.000      | 0.070  | 0.066 | 0.043  | 0.036 |
|              | V1 / degrees                               | 0.000      | 2.299  | 1.470 | 0.762  | 0.558 |
| SNR 40       | FA                                         | 0.016      | 0.023  | 0.019 | 0.019  | 0.013 |
|              | MD / $10^{-3} \text{ mm}^2 \text{ s}^{-1}$ | 0.023      | 0.081  | 0.082 | 0.052  | 0.043 |
|              | V1 / degrees                               | 3.711      | 4.836  | 3.589 | 3.665  | 2.586 |
| SNR 20       | FA                                         | 0.052      | 0.050  | 0.043 | 0.049  | 0.033 |
|              | MD / $10^{-3} \text{ mm}^2 \text{ s}^{-1}$ | 0.083      | 0.132  | 0.118 | 0.097  | 0.078 |
|              | V1 / degrees                               | 11.448     | 10.716 | 9.777 | 10.846 | 7.593 |

(c) **Small distortion.** Errors in diffusion metrics averaged across all brain voxels with  $<2$  mm geometric distortion.

Table 1: As in Table 1C, errors for FA, MD and the principle diffusion direction V1, but here divided into regions of interest based on the amount of distortion in the data. Values shown are the mean across the five noise realisations. V1 errors were only calculated in voxels with a ground-truth FA  $>0.2$ . Errors (calculated as the standard deviation of the mean value for each noise realisation) not shown as they were all 0 to 3 decimal places.
